# Supplementary material for: What caused a record high PM 10 episode in northern Europe in October 2020?
Source: Copernicus journal article supplement (doi:10.5194/acp-22-3789-2022), 2022-03-22
Supplement: Supplementary file 1 [file acp-22-3789-2022-supplement.zip]

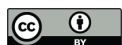

## *Supplement of*

# **What caused a record high PM<sub>10</sub> episode in northern Europe in October 2020?**

**Christine D. Groot Zwaaftink et al.**

*Correspondence to:* Christine D. Groot Zwaaftink (cgz@nilu.no)

- acp-22-3789-2022-supplement-title-page.pdf
- supplement
  - SEVIRI\_dust\_RGB.mp4
  - Supplement\_FLEXPART\_BC\_animation.avi
  - Supplement\_FLEXPART\_dust\_animation.avi

The copyright of individual parts of the supplement might differ from the article licence.
